# Supplementary material
Source: Royal Society of Chemistry journal article supplement (doi:10.1039/d5fo04667j)
Supplement: d5fo04667j1.pdf [file d5fo04667j1.pdf]

### Effects of a phenolic-rich grape pomace extract on intestinal barrier, gut microbiota, and adipose tissue in high-fat diet-fed mice

**Supplementary Figure 1. GPE prevents body weight and glucose intolerance in mice fed a HFD.**

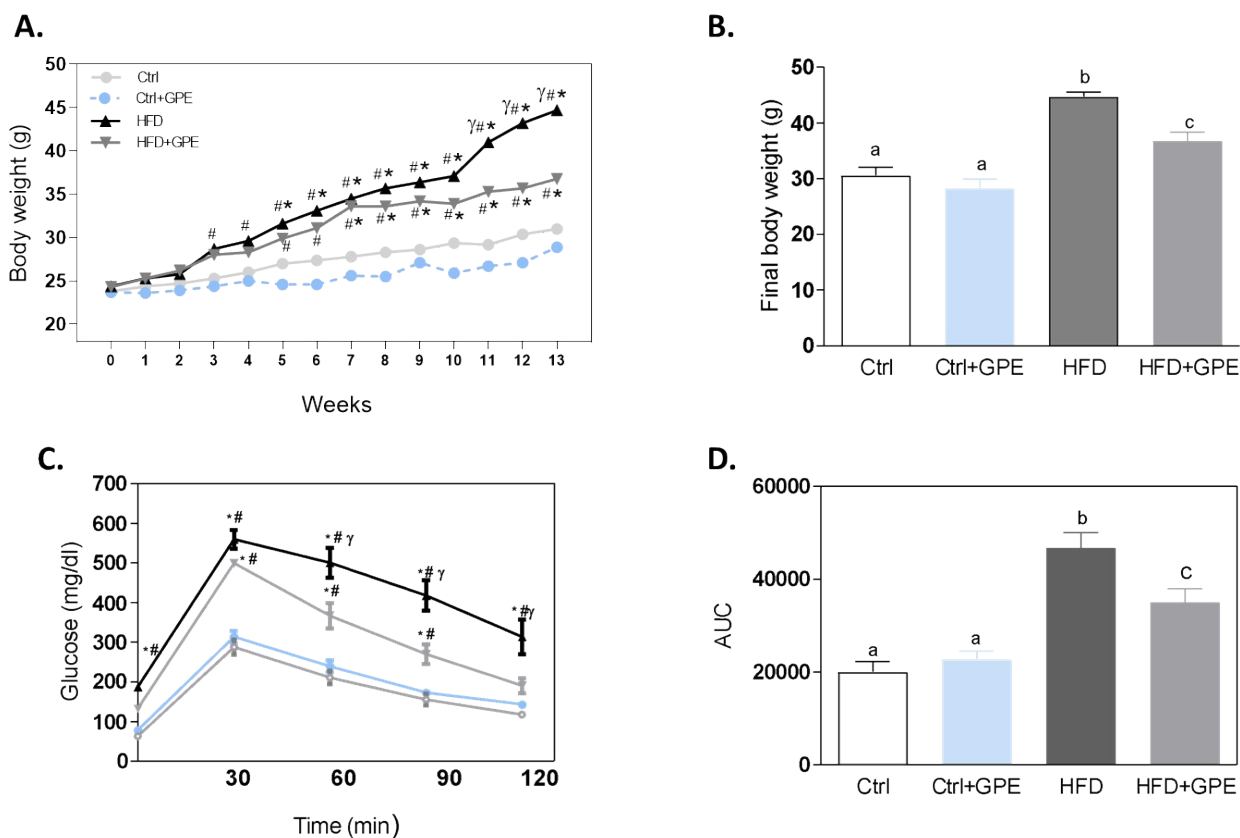

**Supplementary Figure 1.** (A-D) Mice were fed a control diet without (Ctrl) or with supplementation with GPE (300 mg/kg body weight/day) and a high-fat diet without (HFD) or with supplementation with GPE (300 mg/kg body weight/day) (HFD+GPE) for 13 weeks. (A) Mice body weight (g), (B) Final body weight (g), (C) Glucose tolerance test (GTT), and (D) The GTT area under the curve. Results are shown as the mean  $\pm$  S.E.M. of 7-8 animals/groups. Values having different superscripts are significantly different ( $P < 0.05$ , one-way ANOVA followed by Tukey's post hoc test). Symbols used in graphs A and C represent significant differences ( $P < 0.05$  two-way ANOVA followed by Tukey's multiple comparison test) from the HFD group as follow \* significantly different vs. Ctrl; # vs. Ctrl+GPE;  $\gamma$  vs. HFD+GPE. In graphs B and D different letter superscripts indicate statistical significance ( $p < 0.05$  one-way ANOVA).

**Supplementary Table 1. Metabolic parameters.**

| Parameters                | Ctrl                     | Ctrl+GPE                 | HFD                         | HFD+GPE                     |
|---------------------------|--------------------------|--------------------------|-----------------------------|-----------------------------|
| Fasted glucose (mg/dL)    | 62.5 ± 4.94 <sup>a</sup> | 78.0 ± 2.14 <sup>a</sup> | 179.9 ± 10.90 <sup>b</sup>  | 140.7 ± 14.00 <sup>c</sup>  |
| Insulin (ng/mL)           | 0.1 ± 0.01 <sup>a</sup>  | 0.2 ± 0.10 <sup>a</sup>  | 0.7 ± 0.08 <sup>b</sup>     | 0.4 ± 0.03 <sup>a</sup>     |
| HOMA:IR                   | 0.4 ± 0.08 <sup>a</sup>  | 0.5 ± 0.07 <sup>a</sup>  | 9.1 ± 1.05 <sup>b</sup>     | 3.9 ± 0.52 <sup>c</sup>     |
| Total Cholesterol (mg/dL) | 84.7 ± 6.18 <sup>a</sup> | 87.9 ± 5.71 <sup>a</sup> | 124.2 ± 8.93 <sup>b,c</sup> | 114.4 ± 5.18 <sup>c</sup>   |
| LDL Cholesterol (mg/dL)   | 80.6 ± 5.32 <sup>a</sup> | 87.7 ± 5.59 <sup>a</sup> | 122.2 ± 8.63 <sup>b</sup>   | 99.6 ± 10.93 <sup>a,b</sup> |
| Triglycerides (mg/dL)     | 32.8 ± 2.88              | 31.9 ± 4.34              | 44.1 ± 5.10                 | 38.5 ± 3.52                 |

**Supplementary Table 1.** Metabolic parameters of mice fed a control diet without (Ctrl) or with supplementation with GPE (300 mg/kg body weight/day) and a high-fat diet without (HFD) or with supplementation with GPE (300 mg/kg body weight/day) (HFD+GPE). Results are shown as the mean ± S.E.M. of 7-8 animals/ treatment. Values having different letters superscripts are significantly different ( $p < 0,05$  one-way ANOVA followed by Tukey's post hoc test).
